# Supplementary material for: What makes a sustainability tool valuable, practical and useful in real-world healthcare practice? A mixed-methods study on the development of the Long Term Success Tool in Northwest London
Source: BMJ Open. 2017 Sep 24;7(9):e014417. doi: 10.1136/bmjopen-2016-014417 (PMC5623390; doi:10.1136/bmjopen-2016-014417)
Supplement: Supplementary file 3 [file bmjopen-2016-014417supp003.xlsx]

## Sheet: Lists
fill in ratings for each time point
charts per time point can be used for analysis, and provide max and min rating as well
use the numbers able to rank and postivity tabs to track changes over time
NOTE positivity rating excludes don’t know and no opinion
do not delete this tab. the following response options are linked to the other tabs using name manager
response options
very good
good
fair
poor
very poor
don't know
no opinion
scroll down to find charts

## Sheet: Instructions and How to
Instructions
This tool aims to help you ensure the improvements you are attempting to make with your project deliver lasting benefits to patients.						Values	Very Good Very Good/Good (VG/G) Good
This tool is designed to encourage reflection on 12 factors identified in the literature as important to long term success and to identify what action your team can take. The tool provides a simple way to rate your impressions on these factors (e.g. to give an overall impression of how your project is doing in relation to each of these factors) and suggest action that is likely to increase the pr…
How to:
1. Every team member should use the Long Term Success Paper form to score and comment on each factor. The Long Term Success Questions within the framework can be used to support team members in scoring the factors.
2. Team scores should be entered in the Excel spreadsheet for each time point.
3. The scores are aggreagted in included in the automated table and visual charts.
4. Outputs can be used to begin a team conversation on risks and possible next steps to enhance the chances of making lasting improvements.
5. The spreadsheet enables 8 possible entry points for a team (up to 20 team members) and will aggregate team data overtime for review and action planning.

## Sheet: Time point A
time point:
	factor	Commitment to the Improvement	Involvement (A)	Involvement (B)	Skills and Capabilities of those involved	Leadership	Team Functioning	Resources in Place	Progress Monitored for Feedback and Learning	Evidence of Benefits	Robust and Adaptable Processes	Alignment with Organisational Culture and Priorities	Support for Improvement	Alignment with External Political and Financial Environment		Comments	Commitment to the Improvement	Involvement (A)	Involvement (B)	Skills and Capabilities of those involved	Leadership	Team Functioning	Resources in Place	Progress Monitored for Feedback and Learning	Evidence of Benefits	Robust and Adaptable Processes	Alignment with Organisational Culture and Priorities	Support for Improvement	Alignment with External Political and Financial Environment
person	1	very good	very good	good	very good	very good	very good	good	very good	good	good	good	good	good		1
	2															2
	3															3
	4															4
	5															5
	6															6
	7															7
	8															8
	9															9
	10															10
	11															11
	12															12
	13															13
	14															14
	15															15
	16															16
	17															17
	18															18
	19															19
	20															20
	factor	Commitment to the Improvement	Involvement (A)	Involvement (B)	Skills and Capabilities of those involved	Leadership	Team Functioning	Resources in Place	Progress Monitored for Feedback and Learning	Evidence of Benefits	Robust and Adaptable Processes	Alignment with Organisational Culture and Priorities	Support for Improvement	Alignment with External Political and Financial Environment
	very good	1	1	0	1	1	1	0	1	0	0	0	0	0
	good	0	0	1	0	0	0	1	0	1	1	1	1	1
	fair	0	0	0	0	0	0	0	0	0	0	0	0	0
	poor	0	0	0	0	0	0	0	0	0	0	0	0	0
	very poor	0	0	0	0	0	0	0	0	0	0	0	0	0
	total response	1	1	1	1	1	1	1	1	1	1	1	1	1
	don't know	0	0	0	0	0	0	0	0	0	0	0	0	0
	no opinion	0	0	0	0	0	0	0	0	0	0	0	0	0
	not able to rate	0	0	0	0	0	0	0	0	0	0	0	0	0
	Total answers	1	1	1	1	1	1	1	1	1	1	1	1	1
	max	very good	very good	good	very good	very good	very good	good	very good	good	good	good	good	good
	min	very good	very good	good	very good	very good	very good	good	very good	good	good	good	good	good
	MEDIAN	very good	very good	good	very good	very good	very good	good	very good	good	good	good	good	good

## Sheet: Time point B
time point:
	factor	Commitment to the Improvement	Involvement (A)	Involvement (B)	Skills and Capabilities of those involved	Leadership	Team Functioning	Resources in Place	Progress Monitored for Feedback and Learning	Evidence of Benefits	Robust and Adaptable Processes	Alignment with Organisational Culture and Priorities	Support for Improvement	Alignment with External Political and Financial Environment		Comments	Commitment to the Improvement	Involvement (A)	Involvement (B)	Skills and Capabilities of those involved	Leadership	Team Functioning	Resources in Place	Progress Monitored for Feedback and Learning	Evidence of Benefits	Robust and Adaptable Processes	Alignment with Organisational Culture and Priorities	Support for Improvement	Alignment with External Political and Financial Environment
person	1															1
	2															2
	3															3
	4															4
	5															5
	6															6
	7															7
	8															8
	9															9
	10															10
	11															11
	12															12
	13															13
	14															14
	15															15
	16															16
	17															17
	18															18
	19															19
	20															20
	factor	Commitment to the Improvement	Involvement (A)	Involvement (B)	Skills and Capabilities of those involved	Leadership	Team Functioning	Resources in Place	Progress Monitored for Feedback and Learning	Evidence of Benefits	Robust and Adaptable Processes	Alignment with Organisational Culture and Priorities	Support for Improvement	Alignment with External Political and Financial Environment
	very good	0	0	0	0	0	0	0	0	0	0	0	0	0
	good	0	0	0	0	0	0	0	0	0	0	0	0	0
	fair	0	0	0	0	0	0	0	0	0	0	0	0	0
	poor	0	0	0	0	0	0	0	0	0	0	0	0	0
	very poor	0	0	0	0	0	0	0	0	0	0	0	0	0
	total response	0	0	0	0	0	0	0	0	0	0	0	0	0
	don't know	0	0	0	0	0	0	0	0	0	0	0	0	0
	no opinion	0	0	0	0	0	0	0	0	0	0	0	0	0
	not able to rate	0	0	0	0	0	0	0	0	0	0	0	0	0
	Total answers	0	0	0	0	0	0	0	0	0	0	0	0	0
	max
	min
	MEDIAN

## Sheet: Time point C
time point:
	factor	Commitment to the Improvement	Involvement (A)	Involvement (B)	Skills and Capabilities of those involved	Leadership	Team Functioning	Resources in Place	Progress Monitored for Feedback and Learning	Evidence of Benefits	Robust and Adaptable Processes	Alignment with Organisational Culture and Priorities	Support for Improvement	Alignment with External Political and Financial Environment		Comments	Commitment to the Improvement	Involvement (A)	Involvement (B)	Skills and Capabilities of those involved	Leadership	Team Functioning	Resources in Place	Progress Monitored for Feedback and Learning	Evidence of Benefits	Robust and Adaptable Processes	Alignment with Organisational Culture and Priorities	Support for Improvement	Alignment with External Political and Financial Environment
person	1															1
	2															2
	3															3
	4															4
	5															5
	6															6
	7															7
	8															8
	9															9
	10															10
	11															11
	12															12
	13															13
	14															14
	15															15
	16															16
	17															17
	18															18
	19															19
	20															20
	factor	Commitment to the Improvement	Involvement (A)	Involvement (B)	Skills and Capabilities of those involved	Leadership	Team Functioning	Resources in Place	Progress Monitored for Feedback and Learning	Evidence of Benefits	Robust and Adaptable Processes	Alignment with Organisational Culture and Priorities	Support for Improvement	Alignment with External Political and Financial Environment
	very good	0	0	0	0	0	0	0	0	0	0	0	0	0
	good	0	0	0	0	0	0	0	0	0	0	0	0	0
	fair	0	0	0	0	0	0	0	0	0	0	0	0	0
	poor	0	0	0	0	0	0	0	0	0	0	0	0	0
	very poor	0	0	0	0	0	0	0	0	0	0	0	0	0
	total response	0	0	0	0	0	0	0	0	0	0	0	0	0
	don't know	0	0	0	0	0	0	0	0	0	0	0	0	0
	no opinion	0	0	0	0	0	0	0	0	0	0	0	0	0
	not able to rate	0	0	0	0	0	0	0	0	0	0	0	0	0
	Total answers	0	0	0	0	0	0	0	0	0	0	0	0	0
	max
	min
	MEDIAN

## Sheet: Time point D
time point:
	factor	Commitment to the Improvement	Involvement (A)	Involvement (B)	Skills and Capabilities of those involved	Leadership	Team Functioning	Resources in Place	Progress Monitored for Feedback and Learning	Evidence of Benefits	Robust and Adaptable Processes	Alignment with Organisational Culture and Priorities	Support for Improvement	Alignment with External Political and Financial Environment		Comments	Commitment to the Improvement	Involvement (A)	Involvement (B)	Skills and Capabilities of those involved	Leadership	Team Functioning	Resources in Place	Progress Monitored for Feedback and Learning	Evidence of Benefits	Robust and Adaptable Processes	Alignment with Organisational Culture and Priorities	Support for Improvement	Alignment with External Political and Financial Environment
person	1															1
	2															2
	3															3
	4															4
	5															5
	6															6
	7															7
	8															8
	9															9
	10															10
	11															11
	12															12
	13															13
	14															14
	15															15
	16															16
	17															17
	18															18
	19															19
	20															20
	factor	Commitment to the Improvement	Involvement (A)	Involvement (B)	Skills and Capabilities of those involved	Leadership	Team Functioning	Resources in Place	Progress Monitored for Feedback and Learning	Evidence of Benefits	Robust and Adaptable Processes	Alignment with Organisational Culture and Priorities	Support for Improvement	Alignment with External Political and Financial Environment
	very good	0	0	0	0	0	0	0	0	0	0	0	0	0
	good	0	0	0	0	0	0	0	0	0	0	0	0	0
	fair	0	0	0	0	0	0	0	0	0	0	0	0	0
	poor	0	0	0	0	0	0	0	0	0	0	0	0	0
	very poor	0	0	0	0	0	0	0	0	0	0	0	0	0
	total response	0	0	0	0	0	0	0	0	0	0	0	0	0
	don't know	0	0	0	0	0	0	0	0	0	0	0	0	0
	no opinion	0	0	0	0	0	0	0	0	0	0	0	0	0
	not able to rate	0	0	0	0	0	0	0	0	0	0	0	0	0
	Total answers	0	0	0	0	0	0	0	0	0	0	0	0	0
	max
	min
	MEDIAN

## Sheet: Time point E
time point:
	factor	Commitment to the Improvement	Involvement (A)	Involvement (B)	Skills and Capabilities of those involved	Leadership	Team Functioning	Resources in Place	Progress Monitored for Feedback and Learning	Evidence of Benefits	Robust and Adaptable Processes	Alignment with Organisational Culture and Priorities	Support for Improvement	Alignment with External Political and Financial Environment		Comments	Commitment to the Improvement	Involvement (A)	Involvement (B)	Skills and Capabilities of those involved	Leadership	Team Functioning	Resources in Place	Progress Monitored for Feedback and Learning	Evidence of Benefits	Robust and Adaptable Processes	Alignment with Organisational Culture and Priorities	Support for Improvement	Alignment with External Political and Financial Environment
person	1															1
	2															2
	3															3
	4															4
	5															5
	6															6
	7															7
	8															8
	9															9
	10															10
	11															11
	12															12
	13															13
	14															14
	15															15
	16															16
	17															17
	18															18
	19															19
	20															20
	factor	Commitment to the Improvement	Involvement (A)	Involvement (B)	Skills and Capabilities of those involved	Leadership	Team Functioning	Resources in Place	Progress Monitored for Feedback and Learning	Evidence of Benefits	Robust and Adaptable Processes	Alignment with Organisational Culture and Priorities	Support for Improvement	Alignment with External Political and Financial Environment
	very good	0	0	0	0	0	0	0	0	0	0	0	0	0
	good	0	0	0	0	0	0	0	0	0	0	0	0	0
	fair	0	0	0	0	0	0	0	0	0	0	0	0	0
	poor	0	0	0	0	0	0	0	0	0	0	0	0	0
	very poor	0	0	0	0	0	0	0	0	0	0	0	0	0
	total response	0	0	0	0	0	0	0	0	0	0	0	0	0
	don't know	0	0	0	0	0	0	0	0	0	0	0	0	0
	no opinion	0	0	0	0	0	0	0	0	0	0	0	0	0
	not able to rate	0	0	0	0	0	0	0	0	0	0	0	0	0
	Total answers	0	0	0	0	0	0	0	0	0	0	0	0	0
	max
	min
	MEDIAN

## Sheet: Time point F
time point:
	factor	Commitment to the Improvement	Involvement (A)	Involvement (B)	Skills and Capabilities of those involved	Leadership	Team Functioning	Resources in Place	Progress Monitored for Feedback and Learning	Evidence of Benefits	Robust and Adaptable Processes	Alignment with Organisational Culture and Priorities	Support for Improvement	Alignment with External Political and Financial Environment		Comments	Commitment to the Improvement	Involvement (A)	Involvement (B)	Skills and Capabilities of those involved	Leadership	Team Functioning	Resources in Place	Progress Monitored for Feedback and Learning	Evidence of Benefits	Robust and Adaptable Processes	Alignment with Organisational Culture and Priorities	Support for Improvement	Alignment with External Political and Financial Environment
person	1															1
	2															2
	3															3
	4															4
	5															5
	6															6
	7															7
	8															8
	9															9
	10															10
	11															11
	12															12
	13															13
	14															14
	15															15
	16															16
	17															17
	18															18
	19															19
	20															20
	factor	Commitment to the Improvement	Involvement (A)	Involvement (B)	Skills and Capabilities of those involved	Leadership	Team Functioning	Resources in Place	Progress Monitored for Feedback and Learning	Evidence of Benefits	Robust and Adaptable Processes	Alignment with Organisational Culture and Priorities	Support for Improvement	Alignment with External Political and Financial Environment
	very good	0	0	0	0	0	0	0	0	0	0	0	0	0
	good	0	0	0	0	0	0	0	0	0	0	0	0	0
	fair	0	0	0	0	0	0	0	0	0	0	0	0	0
	poor	0	0	0	0	0	0	0	0	0	0	0	0	0
	very poor	0	0	0	0	0	0	0	0	0	0	0	0	0
	total response	0	0	0	0	0	0	0	0	0	0	0	0	0
	don't know	0	0	0	0	0	0	0	0	0	0	0	0	0
	no opinion	0	0	0	0	0	0	0	0	0	0	0	0	0
	not able to rate	0	0	0	0	0	0	0	0	0	0	0	0	0
	Total answers	0	0	0	0	0	0	0	0	0	0	0	0	0
	max
	min
	MEDIAN

## Sheet: Time point G
time point:
	factor	Commitment to the Improvement	Involvement (A)	Involvement (B)	Skills and Capabilities of those involved	Leadership	Team Functioning	Resources in Place	Progress Monitored for Feedback and Learning	Evidence of Benefits	Robust and Adaptable Processes	Alignment with Organisational Culture and Priorities	Support for Improvement	Alignment with External Political and Financial Environment		Comments	Commitment to the Improvement	Involvement (A)	Involvement (B)	Skills and Capabilities of those involved	Leadership	Team Functioning	Resources in Place	Progress Monitored for Feedback and Learning	Evidence of Benefits	Robust and Adaptable Processes	Alignment with Organisational Culture and Priorities	Support for Improvement	Alignment with External Political and Financial Environment
person	1															1
	2															2
	3															3
	4															4
	5															5
	6															6
	7															7
	8															8
	9															9
	10															10
	11															11
	12															12
	13															13
	14															14
	15															15
	16															16
	17															17
	18															18
	19															19
	20															20
	factor	Commitment to the Improvement	Involvement (A)	Involvement (B)	Skills and Capabilities of those involved	Leadership	Team Functioning	Resources in Place	Progress Monitored for Feedback and Learning	Evidence of Benefits	Robust and Adaptable Processes	Alignment with Organisational Culture and Priorities	Support for Improvement	Alignment with External Political and Financial Environment
	very good	0	0	0	0	0	0	0	0	0	0	0	0	0
	good	0	0	0	0	0	0	0	0	0	0	0	0	0
	fair	0	0	0	0	0	0	0	0	0	0	0	0	0
	poor	0	0	0	0	0	0	0	0	0	0	0	0	0
	very poor	0	0	0	0	0	0	0	0	0	0	0	0	0
	total response	0	0	0	0	0	0	0	0	0	0	0	0	0
	don't know	0	0	0	0	0	0	0	0	0	0	0	0	0
	no opinion	0	0	0	0	0	0	0	0	0	0	0	0	0
	not able to rate	0	0	0	0	0	0	0	0	0	0	0	0	0
	Total answers	0	0	0	0	0	0	0	0	0	0	0	0	0
	max
	min
	MEDIAN

## Sheet: Time point H
time point:
	factor	Commitment to the Improvement	Involvement (A)	Involvement (B)	Skills and Capabilities of those involved	Leadership	Team Functioning	Resources in Place	Progress Monitored for Feedback and Learning	Evidence of Benefits	Robust and Adaptable Processes	Alignment with Organisational Culture and Priorities	Support for Improvement	Alignment with External Political and Financial Environment		Comments	Commitment to the Improvement	Involvement (A)	Involvement (B)	Skills and Capabilities of those involved	Leadership	Team Functioning	Resources in Place	Progress Monitored for Feedback and Learning	Evidence of Benefits	Robust and Adaptable Processes	Alignment with Organisational Culture and Priorities	Support for Improvement	Alignment with External Political and Financial Environment
person	1															1
	2															2
	3															3
	4															4
	5															5
	6															6
	7															7
	8															8
	9															9
	10															10
	11															11
	12															12
	13															13
	14															14
	15															15
	16															16
	17															17
	18															18
	19															19
	20															20
	factor	Commitment to the Improvement	Involvement (A)	Involvement (B)	Skills and Capabilities of those involved	Leadership	Team Functioning	Resources in Place	Progress Monitored for Feedback and Learning	Evidence of Benefits	Robust and Adaptable Processes	Alignment with Organisational Culture and Priorities	Support for Improvement	Alignment with External Political and Financial Environment
	very good	0	0	0	0	0	0	0	0	0	0	0	0	0
	good	0	0	0	0	0	0	0	0	0	0	0	0	0
	fair	0	0	0	0	0	0	0	0	0	0	0	0	0
	poor	0	0	0	0	0	0	0	0	0	0	0	0	0
	very poor	0	0	0	0	0	0	0	0	0	0	0	0	0
	total response	0	0	0	0	0	0	0	0	0	0	0	0	0
	don't know	0	0	0	0	0	0	0	0	0	0	0	0	0
	no opinion	0	0	0	0	0	0	0	0	0	0	0	0	0
	not able to rate	0	0	0	0	0	0	0	0	0	0	0	0	0
	Total answers	0	0	0	0	0	0	0	0	0	0	0	0	0
	max
	min
	MEDIAN

[truncated: 1 more sheets: Median Display]
